# Supplementary material for: Synthesis of Folic Acid-Modified DOX@ZIF-8 Nanoparticles for Targeted Therapy of Liver Cancer
Source: Hindawi journal article supplement (doi:10.1155/2018/1357812), 2018-07-30
Supplement: f1 [file 1357812.f1.docx]

**Supplementary Figure 1**

**
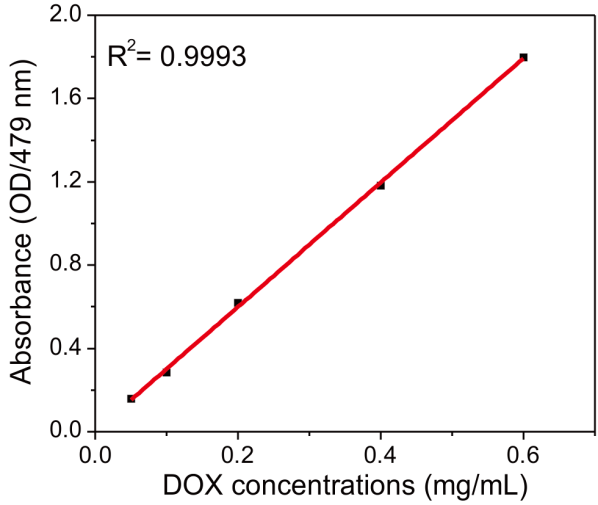
**

**Supplementary Figure 1:** The calibration curve of DOX in PBS (pH = 7.4) tested by UV-Vis method.


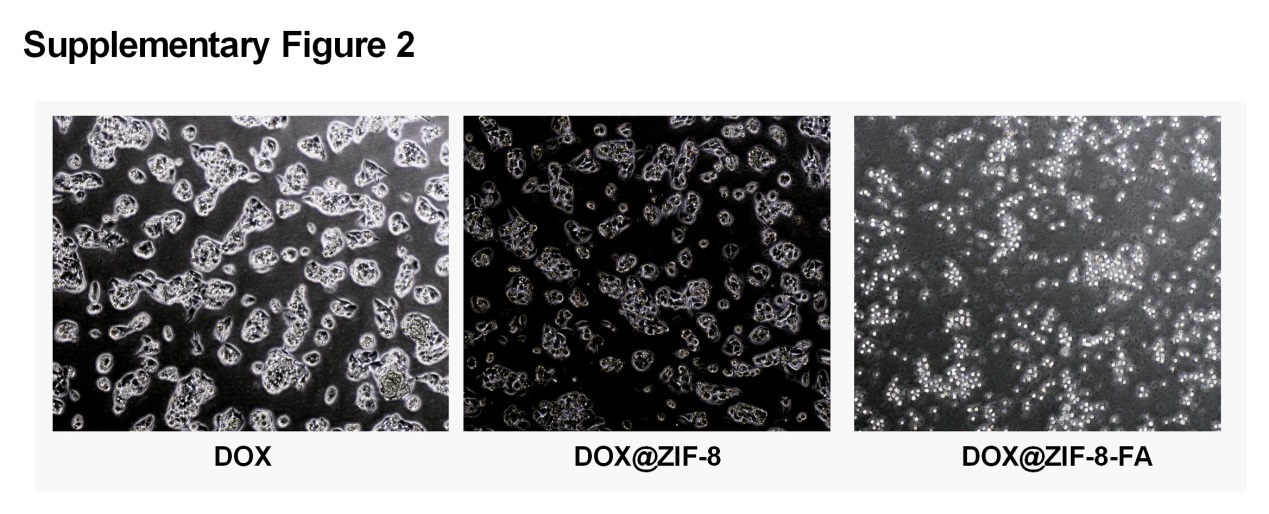


**Supplementary Figure 2:** The cell morphology was destroyed after treated with DOX@ZIF nanoparticles or DOX@ZIF-8-FA nanoparticles compared to DOX.
